1                                   **Title: Evolutionary assembly patterns of prokaryotic genomes**

2

3 **Authors:** Maximilian O. Press<sup>1</sup>, Christine Queitsch<sup>1</sup>, Elhanan Borenstein<sup>1,2,3\*</sup>

4

5 **Affiliations**

6 <sup>1</sup>: Department of Genome Sciences, University of Washington, Seattle, WA, USA

7 <sup>2</sup>: Department of Computer Science and Engineering, University of Washington, Seattle, WA,

8 USA

9 <sup>3</sup>: External Faculty, Santa Fe Institute, Santa Fe, NM, USA

10 \*Correspondence to: [elbo@uw.edu](mailto:elbo@uw.edu)

11

12 **Running title:** Evolutionary assembly of prokaryotic genomes

13

14 **Keywords**

15 Genome evolution, prokarya, prokaryote, constraint, epistasis, comparative method, evolutionary  
16 predictability, RuBisCO, parallel evolution.

17 **Abstract:**

18 Evolutionary innovation must occur in the context of some genomic background, which limits  
19 available evolutionary paths. For example, protein evolution by sequence substitution is  
20 constrained by epistasis between residues. In prokaryotes, evolutionary innovation frequently  
21 happens by macrogenomic events such as horizontal gene transfer (HGT). Previous work has  
22 suggested that HGT can be influenced by ancestral genomic content, yet the extent of such gene-  
23 level constraints has not yet been systematically characterized. Here, we evaluated the  
24 evolutionary impact of such constraints in prokaryotes, using probabilistic ancestral  
25 reconstructions from 634 extant prokaryotic genomes and a novel framework for detecting  
26 evolutionary constraints on HGT events. We identified 8,228 directional dependencies between  
27 genes, and demonstrated that many such dependencies reflect known functional relationships,  
28 including, for example, evolutionary dependencies of the photosynthetic enzyme RuBisCO.  
29 Modeling all dependencies as a network, we adapted an approach from graph theory to establish  
30 chronological precedence in the acquisition of different genomic functions. Specifically, we  
31 demonstrated that specific functions tend to be gained sequentially, suggesting that evolution in  
32 prokaryotes is governed by functional assembly patterns. Finally, we showed that these  
33 dependencies are universal rather than clade-specific and are often sufficient for predicting  
34 whether or not a given ancestral genome will acquire specific genes. Combined, our results  
35 indicate that evolutionary innovation via HGT is profoundly constrained by epistasis and  
36 historical contingency, similar to the evolution of proteins and phenotypic characters, and  
37 suggest that the emergence of specific metabolic and pathological phenotypes in prokaryotes can  
38 be predictable from current genomes.

39

## 40 INTRODUCTION:

41 A fundamental question in evolutionary biology is how present circumstances affect future  
42 adaptation and phenotypic change (Gould and Lewontin 1979). Studies of specific proteins, for  
43 example, indicate that epistasis between sequence residues limits accessible evolutionary  
44 trajectories and thereby renders certain adaptive paths more likely than others (Weinreich et al.  
45 2006; Gong et al. 2013; de Visser and Krug 2014; Harms and Thornton 2014). Similarly, both  
46 phenotypic characters (Ord and Summers 2015) and specific genetic adaptations (Christin et al.  
47 2015; Conte et al. 2012) show strong evidence of parallel evolution rather than convergent  
48 evolution. That is, a given adaptation is more likely to repeat in closely related organisms than in  
49 distantly related ones. This inverse relationship between the repeatability of evolution and  
50 taxonomic distance implies a strong effect of lineage-specific contingency on evolution, also  
51 potentially mediated by epistasis (Orr 2005).

52 Such observations suggest that genetic adaptation is often highly constrained and that the  
53 present state of an evolving system can impact future evolution. Yet, the studies above are  
54 limited to small datasets and specific genetic pathways, and a more principled understanding of  
55 the rules by which future evolutionary trajectories are governed by the present state of the system  
56 is still lacking. For example, it is not known whether such adaptive constraints are a feature of  
57 genome-scale evolution or whether they are limited to finer scales. Moreover, the mechanisms  
58 that underlie observed constraints are often completely unknown. Addressing these questions is  
59 clearly valuable for obtaining a more complete theory of evolutionary biology, but more  
60 pressingly, is essential for tackling a variety of practical concerns including our ability to combat  
61 evolving infectious diseases or engineer complex biological systems.

62           Here, we address this challenge by analyzing horizontal gene transfer (HGT) in  
63 prokaryotes. HGT is an ideal system to systematically study genome-wide evolutionary  
64 constraints because it involves gene-level innovation, occurs at very high rates relative to  
65 sequence substitution (Nowell et al. 2014; Puigbò et al. 2014), and is a principal source of  
66 evolutionary novelty in prokaryotes (Gogarten et al. 2002; Jain et al. 2003; Lerat et al. 2005;  
67 Puigbò et al. 2014). Clearly, many or most acquired genes are rapidly lost due to fitness costs  
68 (van Passel et al. 2008; Baltrus 2013; Soucy et al. 2015), indicating that genes retained in the  
69 long term are likely to provide a selective advantage. Moreover, not all genes are equally  
70 transferrable (Jain et al. 1999; Sorek et al. 2007; Cohen et al. 2011), and not all species are  
71 equally receptive to the same genes (Smillie et al. 2011; Soucy et al. 2015). However,  
72 differences in HGT among species have been attributed not only to ecology (Smillie et al. 2011)  
73 or to phylogenetic constraints (Nowell et al. 2014; Popa et al. 2011), but also to interactions with  
74 the host genome (Jain et al. 1999; Cohen et al. 2011; Popa et al. 2011). Indeed, studies involving  
75 single genes or single species support the influence of genome content on the acquisition and  
76 retention of transferred genes (Pal et al. 2005; Iwasaki and Takagi 2009; Chen et al. 2011; Press  
77 et al. 2013; Sorek et al. 2007; Johnson and Grossman 2014). For example, it has been  
78 demonstrated that the presence of specific genes facilitates integration of others into genetic  
79 networks (Chen et al. 2011), and that genes are more commonly gained in genomes already  
80 containing metabolic genes in the same pathway (Pal et al. 2005; Iwasaki and Takagi 2009).  
81 However, to date, a systematic, large-scale analysis of such dependencies has not been presented.  
82 In this paper, we therefore set out to characterize a comprehensive collection of genome-wide  
83 HGT-based dependencies among prokaryotic genes, analyze the obtained set of epistatic  
84 interactions, and identify patterns in the evolution of prokaryotic genomes.

## 85 **RESULTS:**

### 86 **PGCE Inference**

87 We first set out to detect pairs of genes for which the presence of one gene in the genome  
88 promotes the gain of the other gene (though not necessarily *vice versa*) (Figure 1). Such “pairs of  
89 genes with conjugated evolution” (PGCEs) represent putative epistatic interactions at the gene  
90 level and may guide genome evolution. To this end, we obtained a collection of 634 prokaryotic  
91 genomes annotated by KEGG (Kanehisa et al. 2012) and linked through a curated phylogeny  
92 (Dehal et al. 2010). For each of the 5801 genes that varied in presence across these genomes, we  
93 reconstructed the probability of this gene’s presence or absence on each branch of the  
94 phylogenetic tree using a previously introduced method (Cohen and Pupko 2010), as well as the  
95 probability that it was gained or lost along these branches using a simple heuristic (Methods).  
96 We confirmed that genes’ presence/absence was robust to the reconstruction method employed  
97 (99.5% agreement between reconstruction methods used; Methods). As expected (Mira et al.  
98 2001), gene loss was more common than gene gain for most genes (Supplemental Figure S1,  
99 Supplemental Text). We additionally confirmed that inferred gains of several genes of interest  
100 were consistent with gains inferred by an alternative HGT inference method (Methods;  
101 Supplemental Text, Supplemental Table S1). From the reconstructions, we estimated the  
102 frequency with which each gene was gained in the presence of each other gene, and followed  
103 previous studies (Maddison 1990; Cohen et al. 2012) in using parametric bootstrapping  
104 (Supplemental Figure S2) to detect PGCEs – gene pairs for which one gene is gained  
105 significantly more often in the presence of the other (Supplemental Figure S3, Supplemental  
106 Text). In total, we identified 8,415 PGCEs. We finally applied a transitive reduction procedure  
107 to discard potentially spurious PGCEs, resulting in a final network containing 8,228 PGCEs

108 connecting a total of 2,260 genes (Supplemental Figures S4, S5, Supplemental Text). A detailed  
109 description of the procedures used can be found in Methods, and the final list of PGCEs is  
110 supplied as Supplemental File S1.

111

### 112 **PGCEs represent biologically relevant dependencies**

113 Comparing this final set of PGCEs to known biological interactions, we confirmed that the  
114 obtained PGCEs represent plausible biological dependencies. For example, genes sharing the  
115 same KEGG Pathway annotations were more likely to form a PGCE (Figure 2A), as were genes  
116 linked in an independently-derived network of bacterial metabolism (Levy and Borenstein 2013)  
117 (Figure 2B). Moreover, PGCEs often linked genes in functionally related pathways  
118 (Supplemental Figure S6, Supplemental Text). We similarly identified specific examples in  
119 which PGCEs connected pairs of genes with well-described functional relationships. One such  
120 example is the PGCE connecting *rbsL* and *rbsS* (sometimes written *rbcL/rbcS*), two genes that  
121 encode the large and small subunits of the well-described photosynthetic enzyme ribulose-1-5-  
122 biphosphate carboxylase-oxygenase (RuBisCO), respectively. The *rbsL* subunit alone has  
123 carboxylation activity in some bacteria, but the addition of *rbsS* increases enzymatic efficiency,  
124 consistent with its PGCE dependency on *rbsL* (Figure 3A) (Andersson and Backlund 2008).  
125 Moreover, these genes are known to undergo substantial horizontal transfer (Delwiche and  
126 Palmer 1996).

127 Multiple additional genes were found to promote *rbsS* gain (88 PGCEs in total,  
128 Supplemental Table S2), many of which, as expected, are associated with carbon metabolism.  
129 Other genes in this set, however, unexpectedly implicated nitrogen acquisition, as well as other  
130 pathways (Supplemental Table S3), in promoting *rbsS* gain. For example, all components of the

131 *urt* urea transport complex had a PGCE link with *rbsS*, as shown by the reconstructed  
132 phylogenetic history of *urtA* and *rbsS* (Figure 3B). This strict dependency could reflect  
133 nitrogen's role as a rate-limiting resource for primary production in phytoplankton and other  
134 photosynthetic organisms (Eppley and Peterson 1979; Sohm et al. 2011). In comparing the  
135 reconstructions from which *urtA-rbsS* and *rbsL-rbsS* dependencies were inferred, we further  
136 observed that *rbsS* is gained only in lineages where both *urtA* and *rbsL* were previously present.  
137 This indicates that while both *rbsL* and *urtA* may be necessary for the acquisition of *rbsS*, neither  
138 *rbsL* nor *urtA* are independently sufficient for the acquisition of *rbsS*. Other PGCEs may interact  
139 in similarly complex fashions in controlling the acquisition of genes, and thus such relationships  
140 may be gene-specific and involve a variety of biological mechanisms that may be difficult to  
141 generalize. For further analyses, we therefore focused on analyzing large-scale patterns of PGCE  
142 connectivity and on exploring how the dependencies between various genes structure the  
143 relationships between functional pathways.

144

#### 145 **PGCE network analyses reveal evolutionary assembly patterns**

146 The *rbsS*-associated PGCEs described above show how PGCEs captured an assembly pattern  
147 involving multiple pathways. Therefore, we next set out to infer global evolutionary assembly  
148 patterns based on the complete set of PGCEs identified. Specifically, we used a network-based  
149 topological sorting approach (Supplemental Text) to rank all genes in the PGCE network.  
150 According to this procedure, genes without dependencies occupy the first rank, genes in the  
151 second rank have PGCE dependencies only on first rank genes, genes in the third rank have  
152 dependencies only on first and second rank genes, and so on until all genes are associated with  
153 some rank. In other words, the obtained ranking represents general patterns in the order by which

154 genes are gained throughout evolution, with the gain of higher-ranked genes succeeding the  
155 presence of the lower-ranked genes on which they depend. Using this approach, we found that  
156 genes could be fully classified into five ranks (Fig 4A). The first rank was by far the largest at  
157 1,593 genes (most genes do not have detectable dependencies), the second rank had 498 genes,  
158 and successive ranks showed declining membership until the last (fifth) rank, with only 5 genes  
159 (Supplemental Table S4).

160 To identify evolutionary assembly patterns from these ranks, we examined the set of  
161 genes in each rank and identified overrepresented functional categories (Table 1). These enriched  
162 functional categories indicate that certain functional groups of genes consistently occupy specific  
163 positions in these evolutionary assembly patterns, whether in controlling other genes' gain or in  
164 being controlled by other genes. For example, we found that the first rank was enriched for  
165 flagellar and pillar genes involved in motility, in addition to Type II secretion genes (many of  
166 which are homologous to or overlap with genes encoding pillar proteins) and certain two-  
167 component genes. The second rank was enriched for various metabolic processes, whereas later  
168 ranks were enriched for Type III and Type IV secretion systems and conjugation genes. This  
169 finding suggests that habitat commitments are made early in evolution, mediated by motility  
170 genes that could underlie the choice and establishment of physical environments. This  
171 environmental choice is followed by a metabolic commitment to exploiting the new habitat. Last,  
172 genes for interaction with the biotic complement of these habitats are gained, and replaced  
173 frequently in response to evolving challenges. Considering two distinct but highly homologous  
174 pilus assembly pathways, one (fimbrial) was enriched in a low rank and one (conjugal) was  
175 enriched in a high rank, suggesting that the specific function of the gene rather than other  
176 sequence-level gene properties drove the ranking (Supplemental Figure S7A). We additionally



177 confirmed that the observed rank distribution for these functions is not explained by variation in  
178 the frequency of gene gain (Supplemental Figure S7B). Furthermore, as expected, we observed  
179 that the gains of genes appearing late in the sort were overrepresented in later branches of the  
180 tree compared to the gains of lower-ranked genes (Figure 4B, Supplemental Figure S8),  
181 suggesting that the chronology of gene acquisition reflects the overall assembly patterns in gain  
182 order.

183

#### 184 **Evolution by HGT is predictable**

185 The chronological ordering of ranks was relatively consistent across the tree (Figure 4B),  
186 indicating that PGCE dependencies are universal across prokaryotes. Notably, this universality  
187 also implies that gene acquisition is predictable from genome content. Put differently, if PGCEs  
188 are universal, then PGCEs inferred in one clade of the tree are informative in making predictions  
189 about gene acquisition in a different clade. Indeed, studies of epistasis-mediated protein  
190 evolution indicate that the constriction of possible mutational paths should lead to predictability  
191 in evolution, if epistasis is sufficiently strong (Weinreich et al. 2006). To explore this hypothesis  
192 explicitly, we partitioned the tree into training and test sets (Figure 5A). As test sets, we selected  
193 the Firmicutes phylum, and the Alphaproteobacteria/Betaproteobacteria subphyla. Choosing  
194 whole clades as test sets (rather than randomly sampling species from throughout the tree)  
195 guarantees that true predictions are based on universal PGCEs, rather than clade-specific PGCEs.  
196 For each test set, we used a model phylogeny that excluded the test subtree as a training set, and  
197 inferred PGCEs based on this pruned tree (Supplemental Table S5, Supplemental Figure S9A).  
198 We then used these inferred PGCEs to score the relative likelihood of the gain of dependent  
199 genes on each branch in the test set, based on the genome content of the branch's ancestor

200 (Figure 5A, Supplemental Table S5, Supplemental Text). We used a naïve and simplistic score:  
201 the proportion of genes upon which the gained gene depends that are present in the reconstructed  
202 ancestor of each branch. In both test sets, we found that prediction quality was surprisingly high  
203 (Figure 5B, Supplemental Figure S9B-C), suggesting that PGCEs are taxonomically universal  
204 and statistically robust in describing relationships between genes. This predictability is consistent  
205 with the hypothesis that gene-gene dependencies constrain the evolution of genomes by HGT.  
206 More broadly, this analysis and our finding that PGCEs can predictably determine future  
207 evolutionary gains provide substantial evidence that the preponderance of parallel evolution over  
208 convergent evolution (Ord and Summers 2015; Conte et al. 2012) may be the result of specific,  
209 identifiable genetic dependencies entraining the evolutionary trajectory taken by similar  
210 genomes.

211

## 212 **DISCUSSION:**

213 Combined, our findings provide substantial evidence to suggest that gene acquisitions in bacteria  
214 are governed by genome content through numerous gene-level dependencies. Our ability to  
215 detect these underlying dependencies is clearly imperfect, owing to various data and  
216 methodological limitations (Supplemental Text, Supplemental Figure S3). Therefore, in reality  
217 the complete dependency network is likely much denser than that described above and includes  
218 numerous dependencies and constraints that our approach may not be able to detect.  
219 Consequently, our estimates should be considered as a lower bound on the extent of gene-gene  
220 interactions, and accordingly, the predictability of HGT.

221 Notably, even considering such caveats, our observations dramatically expand our  
222 knowledge of the constraints on HGT. Previous studies of such constraints demonstrated that

223 genes frequently acquired by HGT tend to occupy peripheral positions in biological networks,  
224 are often associated with specific cellular functions, and are phylogenetically clustered (Jain et  
225 al. 1999; Cohen et al. 2011). These observations suggested that properties of transferred genes  
226 are also important determinants of HGT regardless of recipient genome content (Jain et al. 1999;  
227 Cohen et al. 2011; Gophna and Ofran 2011) and that the acquisition of certain genes is clade-  
228 specific (Popa et al. 2011; Andam and Gogarten 2011). In contrast, our analysis demonstrates the  
229 importance of recipient genome content in influencing the propensity of a new gene to be  
230 acquired. In fact, to some extent, properties previously reported as determining the general  
231 “acquirability” of genes across all species may reflect an average constraint across genomes. By  
232 considering also variation in genomes acquiring genes, our analysis focused on specific  
233 biological effects, whose strengths may vary from genome to genome.

234         Importantly, our model that gene acquisition is affected by recipient genome content is  
235 consistent with the observed enrichment of HGT among close relatives, which presumably have  
236 similar genome content (Gogarten et al. 2002; Andam and Gogarten 2011; Popa et al. 2011;  
237 Popa and Dagan 2011). This taxonomic clustering of innovation by HGT is also in agreement  
238 with previous studies that demonstrated that phenotypic and genetic parallel evolution is more  
239 common than convergent evolution, potentially due to the effects of historical contingency  
240 (Gould and Lewontin 1979; Conte et al. 2012; Christin et al. 2015; Ord and Summers 2015).  
241 However, in contrast to other studies, we present direct evidence that the mechanism by which  
242 contingency controls evolution is epistasis. Furthermore, the universality of PGCEs shows that  
243 the constraints underlying the effect of contingency operate outside the context of parallel  
244 evolution.

245         Put differently, since each phylum-level clade is subject to an independent evolutionary

246 trajectory, it is unlikely that the same dependency patterns would repeat solely due to parallel  
247 evolution. Moreover, our ability to predict where exactly along the tree gains of a specific gene  
248 are likely to occur (Figure 5B) suggests that PGCEs successfully capture how *variation* in the  
249 genomic content (even among closely related species) affects future gain events. Such PGCE  
250 specificity therefore indicates that observed dependencies are not a trivial byproduct of prevalent  
251 gene transfer events among taxonomically closely related genomes (e.g., due to homologous  
252 recombination constraints; Popa et al. 2011). Nonetheless, the relative contributions of each of  
253 these various processes governing the assembly of prokaryotic genomes (and the evolution of  
254 complex systems in general) clearly deserve future study.

255         It should also be noted that while our analysis revealed several intriguing patterns, the  
256 precise interpretation of some of these patterns remains unclear. For instance, the observed  
257 correspondence of topological ranks of genes to chronology suggests that evolutionary age is a  
258 potential contributor to such ranking, especially considering that our reconstructions likely lack  
259 many genes that have not been retained in any extant genomes. However, the biological  
260 plausibility and statistical robustness of PGCEs demonstrated above strongly argue that the  
261 observed evolutionary patterns are the result of constraint-inducing dependencies. Future work  
262 may therefore aim to quantify the trade-off between functional and chronological determinants in  
263 apparent evolutionary constraints.

264         Finally, we demonstrate the predictability of genomic evolution by horizontal transfer  
265 from current genomic content. As stated above, this finding also suggests that such dependencies  
266 are fairly universal across the prokaryotic tree. It should be noted that our approach was designed  
267 specifically to understand the PGCE network's significance and universality, rather than predict  
268 gene acquisition. It is likely that an approach specifically engineered for gene acquisition

269 prediction would substantially outperform our approach. The estimates of predictability of  
270 genomic evolution presented here are accordingly quite conservative.

271 The determinism and predictability of evolutionary patterns therefore appear to be an  
272 outcome not only of intramolecular epistasis in proteins or phylogenetic constraints, but also of  
273 genome-wide interactions between genes. This suggests that the evolution of medically,  
274 economically, and ecologically important traits in prokaryotes depends on ancestral genome  
275 content and is hence at least partly predictable, potentially informing research in the  
276 epidemiology of infectious diseases, bioengineering, and biotechnology.

277

## 278 **METHODS**

279 All mathematical operations and statistical analyses were performed in R 2.15.3 (R Core Team  
280 2016). Probabilistic ancestral reconstructions were obtained using the *gainLoss* program (Cohen  
281 and Pupko 2010). Phylogenetic simulations and plots were performed with the APE library  
282 (Paradis et al. 2004). Network analyses and algorithms were implemented using either the *igraph*  
283 (Csardi and Nepusz 2006) or *NetworkX* (Hagberg et al. 2013) libraries, and visualized using  
284 Cytoscape v3.1.1 (Shannon et al. 2003).

285

## 286 **Phylogenies**

287 We used a pre-computed phylogenetic tree (Dehal et al. 2010) as a model of bacterial evolution.  
288 We mapped all extant organisms in this tree to organisms in the KEGG database by their NCBI  
289 genome identifiers, and pruned all tips that did not directly and uniquely map to KEGG. This  
290 yielded a phylogenetic tree connecting 634 prokaryotic species. For analyses involving subtrees  
291 of this phylogenetic tree, we used iTOL (Letunic and Bork 2011) to extract subtrees.

292

### 293 **Inferring phylogenetic histories for genes**

294 We used the *gainLoss* v1.266 software (Cohen and Pupko 2010), a set of presence/absence  
295 patterns of orthologous genes from KEGG (Kanehisa et al. 2012), and the phylogenetic tree  
296 described above to infer 1) the probabilities of presence and absence of genes at internal nodes of  
297 the tree, 2) gain and loss rates of each gene, and 3) tree branch lengths within a single model.  
298 Specifically, in running *gainLoss*, we assumed a stationary evolutionary process, with gene gain  
299 and loss rates for each gene modeled as a mixture of three rates drawn from gamma distributions  
300 defined based on overall initial presence/absence patterns. A complete list of parameters used for  
301 *gainLoss* runs is given in the Supplemental Text and as Supplemental File S2. The *gainLoss* log  
302 file for the principal run on the full tree is also included as Supplemental File S3. Based on these  
303 models, we obtained a probabilistic ancestral reconstruction based on stochastic mapping for  
304 each of 5801 genes that were present in at least one species and absent in at least one species,  
305 and filtered out genes that were found to be gained less than twice throughout the tree, yielding  
306 5031 genes which we further analyzed.

307

### 308 **Inferring gains and presence of genes on branches.**

309 To focus on gain events with strong support and where the gained gene is retained (rather than  
310 gain events where the gene is subsequently lost along the same branch), we used a simple model  
311 for computing the probability of different evolutionary gain/loss scenarios based on *gainLoss*  
312 ancestral reconstructions rather than directly using *gainLoss* gain inferences (Supplemental  
313 Text). Specifically, we assumed that unobserved gains and losses are not relevant, and that  
314 evolutionary scenarios are defined by the states at the ancestor and descendant nodes of each

315 branch (regardless of branch length). With these assumptions, we used the probabilities of  
316 presence and absence of each of 5031 genes at each node and tip on the tree to compute the  
317 probability of each branch undergoing each scenario: 1) gain (absent in ancestor and present in  
318 descendant), 2) presence (present in both ancestor and descendant), and 3) loss (present in  
319 ancestor and absent in descendant; Supplemental Text). For a gene X on a branch with ancestor  
320 A and descendant B, we assume:

321 1.  $\Pr(X \text{ present on branch}) = \Pr(X \text{ present in A} \cap X \text{ present in B}) =$

322  $\Pr(X \text{ present in A}) * \Pr(X \text{ present in B})$

323 2.  $\Pr(X \text{ gained on branch}) = \Pr(X \text{ absent in A} \cap X \text{ present in B}) =$

324  $\Pr(X \text{ absent in A}) * \Pr(X \text{ present in B})$

325 3.  $\Pr(X \text{ lost on branch}) = \Pr(X \text{ present in A} \cap X \text{ absent in B}) =$

326  $\Pr(X \text{ present in A}) * \Pr(X \text{ absent in B})$

327 Note again that these probability estimates are distinct from those obtained by using the *gainLoss*  
328 continuous-time Markov chain on the same ancestral reconstruction, which consider also  
329 hypothetical gains that are not retained and are thus not relevant to our analysis (Supplemental  
330 Text).

331

### 332 **Robustness analysis of reconstruction method**

333 We used a maximum-parsimony reconstruction as inferred by *gainLoss* to benchmark the  
334 accuracy of the *gainLoss* reconstruction by stochastic mapping. In this analysis, only internal  
335 node reconstructions were considered, as tip reconstructions (for which the states are known) are  
336 not informative about algorithm performance. Since the maximum-parsimony reconstruction is  
337 binary (presence/absence) and the stochastic mapping reconstruction is probabilistic, for

338 purposes of comparison we rounded the probabilities of the stochastic mapping reconstruction to  
339 obtain a presence/absence reconstruction (*i.e.*, a probability  $>0.5$  denotes presence and  $\leq 0.5$   
340 denotes absence). We computed the agreement between the two reconstructions as the  
341 percentage of internal node reconstructions that agree on the state of the gene.

342

### 343 **Comparison of analyzed gains to reconciliation-based HGT inference.**

344 We compared gains inferred by our method for several genes central to the PGCE network to  
345 gain events reported in a searchable database of horizontally acquired genes inferred by a  
346 sequence-based reconciliation method (Jeong et al. 2015). To this end, we classified all branches  
347 supporting a gain event for each of these genes with  $>50\%$  probability by our method as ‘*true*’  
348 gains. We next searched the reconciliation database (all queries performed between January 15<sup>th</sup>  
349 and February 20<sup>th</sup>, 2016) for each gene, identifying orthologous genes across 2,472 genomes that  
350 exhibit HGT according to reconciliation (excluding events that occurred on branches without  
351 descendants). We manually compared descendants of the remaining events from our method  
352 with the genomes experiencing gene acquisition in the reconciliation dataset to assess overlap  
353 between these two methods (see Supplemental Text).

354

### 355 **Quantifying PGCEs**

356 We defined a “pair of genes with conjugated evolution” (PGCE) as a gene pair ( $i, j$ ) for which  
357 the presence of one gene  $i$  encourages the gain of the other,  $j$ . Considering these genes as  
358 phylogenetic characters, we therefore aim to detect pairs for which “gain” state transitions for  
359 character  $j$  are enriched on branches where character  $i$  remains in the “present” state. This  
360 problem is related to previous methods for detecting coevolution or correlation between



361 phylogenetic characters (Maddison 1990; Huelsenbeck et al. 2003; Cohen et al. 2012). Given  $N$   
362 branches and  $k$  genes, there are  $2 N \times k$  matrices,  $P$  and  $G$ , describing the probabilities,  
363 respectively, of presence and gain of each gene along each branch (using our model for  
364 estimating gains described above). The test statistic for a dependency between each gene pair ( $i$ ,  
365  $j$ ) is the expected number of branches where the gain of gene  $j$  occurs, while conditioning on the  
366 presence of gene  $i$  (cell  $C_{ij}$  in a  $k \times k$  matrix  $C$ ). Counting transitions of one character (gene  $j$   
367 gain) given some state of another character (gene  $i$  presence) yields a standard test statistic for  
368 testing correlated evolution of binary characters on phylogenies (Maddison 1990). To compute  $C$   
369 across  $N$  branches, we sum the conditional probabilities of the gain of gene  $j$  in the presence of  
370 gene  $i$  across the tree, *i.e.* the products of the two  $N \times k$  matrices,  $P$  (presence) and  $G$  (gain), for  
371 each gene pair:

$$C_{ij} = \sum_{n=1}^N G_{nj} P_{ni}$$

372  
373 Entries in  $C$  which are significantly larger than a null expectation of gains represent PGCEs  
374 between the row and column genes of  $C$ .

375

### 376 **Null distribution for PGCEs**

377 For two independently evolving genes  $i$  and  $j$ , the counted gains of  $j$  in the presence of  $i$ ,  $C_{ij}$ , will  
378 be distributed under the null hypothesis (independent evolution) as some function of the  
379 prevalence of  $i$  (the sum of  $P_i$ , the vector of probabilities of presence of  $i$  across branches of the  
380 tree), the expected number of branches where  $j$  is gained (the sum of  $G_j$ , the vector of  
381 probabilities of gains of  $j$  across nodes of the tree), and the topology and branch lengths of the  
382 tree ( $\tau$ ):

$$C_{ij} \sim f(P_i, G_j, \tau)$$

383 We followed previous studies (Cohen et al. 2012; Huelsenbeck et al. 2003; Maddison 1990) by  
384 approximating this null distribution via parametric bootstrapping. Specifically, we simulated the  
385 evolution of  $10^5$  genes along the tree using the APE library function *rTraitDisc()* (Paradis et al.  
386 2004). For the gain and loss rates used in these simulations, we used *gainLoss* gain and loss rates  
387 estimated for the 5801 empirical genes. We fit gamma distributions to these values by maximum  
388 likelihood using the function *fitdistr()* from the MASS library (Venables and Ripley 2002). For  
389 both gains and losses, we increased the shape parameter of the gamma distribution (by a factor of  
390 3 for gains, 1.5 for losses), to ensure that simulated genes showed sufficiently large numbers of  
391 gains. This was necessary because parametric bootstrapping with the rates inferred by *gainLoss*  
392 resulted in left skewed distributions of gene gains (compare Supplemental Figures S2A, S2C,  
393 and S2E), which were likely to confound null models. For our null models to be applicable, the  
394 distribution of simulated gene gains should be roughly similar to the distribution of gains among  
395 empirical genes (see Supplemental Figure S2, Supplemental Text).

396 These simulated genes should evolve independently and thus represent a null model for  
397 PGCEs. As above, we constructed matrices representing the probabilities of presence and gain of  
398 these  $10^5$  genes across all of the branches of the phylogeny ( $P_{null}$  and  $G_{null}$ ). We then multiplied  
399 these matrices of simulated genes to compute a  $10^5 \times 10^5$  matrix  $C_{null}$  of expected branch counts  
400 under a model of independence. We excluded gene pairs with  $C_{ij} \leq 1$  from further analysis, as it  
401 may be difficult to distinguish between no association and a lack of statistical power for such  
402 pairs (Supplemental Figure S3A), reducing overall power in computing false discovery rates  
403 (Bourgon et al. 2010). As a null distribution for each pair of genes  $i$  and  $j$  with  $C_{ij} > 1$ , we used  
404 the 1000 simulated genes with prevalence closest to gene  $i$  (rows of  $C_{null}$ ), and the 1000

405 simulated genes with a number of gains closest to gene  $j$  (columns of  $C_{null}$ ). We used the  $10^6$   
406 simulated observations in the resulting submatrix of  $C_{null}$  as a null distribution for  $C_{ij}$ . Notably,  
407  $C_{ij}$  includes non-integer count expectations, whereas  $C_{null}$  represents integer counts (because the  
408 true reconstruction is known). Consequently, we floored values in  $C_{ij}$ , such that all counts were  
409 truncated at the decimal point. The comparison of  $C_{ij}$  to this null distribution yields an empirical  
410 p-value; we rejected the null hypothesis of independence between genes  $i$  and  $j$  for the  $C_{ij}$   
411 observation at a 1% false discovery rate (Benjamini and Hochberg 1995) ( $P < 7 \times 10^{-6}$ ).

412

### 413 **Constructing a PGCE network.**

414 For each entry in  $C_{ij}$  for which we observed a significant association, we recorded an edge from  
415 gene  $i$  to gene  $j$  in a network of PGCEs. To focus purely on direct interactions, we subjected this  
416 network to a transitive reduction (Hsu 1975). This reduction requires a directed acyclic graph  
417 (DAG). To identify the largest possible DAG in our PGCE network, we identified and removed  
418 the minimal set of edges inducing cycles (Supplemental Text). We performed a transitive  
419 reduction of the resulting DAG using Hsu's algorithm (Hsu 1975) (Supplemental Text).

420

### 421 **Mapping biological information to the network.**

422 We used network rewiring (as implemented in the *rewire()* function of the *igraph* library (Csardi  
423 and Nepusz 2006)) to generate null distributions of the PGCE network by randomly exchanging  
424 edges between pairs of connected nodes, while excluding self-edges. In each permutation, we  
425 performed  $5N$  rewiring operations, where there are  $N$  edges in the network, to ensure sufficient  
426 randomization. To estimate the relationship between the PGCE network and biological  
427 information we calculated the number of edges shared between the PGCE network and a

428 metabolic network of all bacterial metabolism obtained from KEGG (Kanehisa et al. 2012; Levy  
429 and Borenstein 2013), and the number of edges shared between members of the same functional  
430 pathway as defined by KEGG, in both the original and randomized networks.

431 To determine whether genes with certain functional annotations were more likely to associate  
432 with one another in the PGCE network, we examined the KEGG Pathway annotations of each  
433 pair of genes in the network. We counted the number of edges leading from each pathway to  
434 each other pathway, and obtained an empirical p-value for this count by comparing it to a null  
435 distribution of the expected counts obtained by random rewiring as above.

436

#### 437 **Topological sorting of PGCE networks**

438 To identify global patterns in our PGCE network, we performed topological sorting (Kahn 1962)  
439 with grouping. Topological sorting finds an absolute ordering of nodes in a directed acyclic  
440 graph (DAG), such that no node later in the ordering has an edge directed towards a node earlier  
441 in the ordering. Grouping the sort allows nodes to have the same rank in the ordering if  
442 precedence cannot be established between them, giving a unique solution. For a description of  
443 the algorithm used, see Supplementary Text.

444

#### 445 **Prediction of HGT events on branches.**

446 We used the PGCE network to predict the occurrence of specific HGT events (gene acquisitions)  
447 on the tree in the following fashion. We used two test/training set partitions, with the clades of  
448 Firmicutes and the Alpha/Betaproteobacteria as independent test sets, and the training sets as the  
449 rest of the tree without these clades. To “train” PGCE networks, we performed ancestral  
450 reconstruction of gene presence, PGCE inference, and network processing just as for the entire

451 tree. We only attempted to predict genes with at least one PGCE dependency (“predictable”  
452 genes). We then considered each branch in the test set independently, attempting to predict  
453 whether each predictable gene was gained on that branch based on the reconstructed genome at  
454 the ancestor node. For each predictable gene-branch combination, our prediction score was the  
455 proportion of the predictable gene’s PGCE dependencies that are present in the ancestor. This is  
456 the dot product of the gene presence/absence pattern of the ancestor node ( $A_i$  across  $i$  potentially  
457 present genes) and a binary vector denoting which genes in the PGCE network the predictable  
458 gene depends on ( $P_i$  across  $i$  genes in potential PGCEs), scaled by  $P_i$ :

$$score = \frac{\sum A_i P_i}{\sum P_i}$$

459 Note that this value ranges between 0 and 1 for each predicted gene. As true gains, we used our  
460 reconstructed gene acquisition events for each branch in the test set. We arbitrarily called any  
461 predictable gene-branch pair with a  $\text{Pr}(\text{gain}) > 0.5$  as a gain, and any predictable gene-branch  
462 pair with  $\text{Pr}(\text{gain}) \leq 0.5$  as no gain. We filtered out any gene-branch pair where the gene was  
463 known to be present with  $\text{Pr} > 0.4$ , as in these cases the gene is probably already present. We  
464 analyzed the accuracy of our prediction scores using receiver operating characteristic (ROC)  
465 analysis and by comparing scores of the gain branches to those of the no-gain branches.

466

#### 467 **Data Access**

468 Parameter and log files for principal analyses are provided as Supplemental Files S2 and S3.

469 Data and code are provided as Supplemental File S4.

470

#### 471 **Acknowledgements**

472 We are obliged to members of the Borenstein and Queitsch laboratories, and to Evgeny  
473 Sokurenko, Joe Felsenstein, and Willie Swanson for helpful discussions. We thank Ofir Cohen  
474 for help with the *gainLoss* program. We thank Hyeon Soo Jeong for help with the HGTree  
475 database. MOP was supported in part by National Human Genome Research Institute  
476 Interdisciplinary Training in Genome Sciences Grant 2T32HG35-16. CQ is supported by  
477 National Institute of Health New Innovator Award DP2OD008371. EB is supported by National  
478 Institute of Health New Innovator Award DP2AT00780201. We thank UW Genome Sciences  
479 Information Technology Services for high-performance computing resources.

480

481

482 **FIGURE LEGENDS**

483 **Figure 1. Workflow for deriving the PGCE network.** (A): a model phylogeny and a set of  
484 gene presence/absence patterns at the tips are used to generate an ancestral reconstruction, from  
485 which gains are inferred. Filled circles represent the presence of a gene (distinguished by color),  
486 empty circles represent absence of that gene. Inverted triangles represent points on the phylogeny  
487 where the gene of the indicated color is inferred to be gained. (B): Based on inferred gain and  
488 loss rates, many evolutionary scenarios are independently simulated and used as a null  
489 expectation for evolutionary independence. Filled circles indicate presence of the simulated gene  
490 and empty circles indicate absence, inverted triangles represent gains of the simulated gene on  
491 the phylogeny. (C): A null distribution derived from simulated gene evolution is used to identify  
492 dependencies between real genes. (D): These dependencies are modeled as a network. Filled  
493 circles indicate genes (nodes), arrows indicate dependencies (edges).

494

495 **Figure 2. PGCEs are enriched for biologically meaningful interactions.** (A): The observed  
496 number of PGCE edges connecting genes in the same pathway (dotted line), compared to the  
497 expected distribution obtained from 1000 rewired networks with identical degree distributions.  
498 (B): The observed number of PGCE edges that also appear in a bacteria-wide metabolic network,  
499 compared to the expected distribution.

500

501 **Figure 3. The phylogenetic history of *rbsL*, *urtA* and *rbsS*.** The presence of each gene in each  
502 branch in the phylogenetic tree is illustrated with a colored circle, with the circle's diameter  
503 scaled to denote the probability of presence. (A): *rbsL* and *rbsS* evolutionary histories; (B): *urtA*

504 and *rbsS* evolutionary histories. The long branch leading to Archaea (bottom-most clade) was  
505 reduced in size for graphical purposes.

506

507 **Figure 4. Topological sorting of the PGCE dependency network reveals assembly patterns**  
508 **that govern the evolutionary process.** (A): Binned dependencies among the six ranks of genes  
509 in the topological sort (left to right). Node size represents the number of genes in each rank  
510 (using natural logarithm-scale). Edge width represents the number of PGCEs between genes in  
511 different rank (natural logarithm-scale), all edges are directed to the right. (B) The gain of genes  
512 from each rank in each branch of the phylogenetic tree is illustrated (circles). The different colors  
513 represent different ranks. Circle sizes correspond to the proportion of gains on a branch  
514 attributed to genes of that rank (e.g. a large red circle indicates that most gains on a branch  
515 correspond to rank 1). The branch to Archaea (lower clade) has been reduced in size for  
516 graphical purposes. See also Supplemental Figure S7.

517

518 **Figure 5. PGCE dependencies lead to taxonomically robust predictability of gene**  
519 **acquisition.** (A): Workflow for predicting gene acquisition between clades of the tree. A training  
520 set is used to build a PGCE dependency model, which is then used to predict on which specific  
521 branches genes are likely to be gained (green circles), based on dependencies inferred from the  
522 training set (red and blue circles). (B): performance of PGCEs in predicting gene acquisitions in  
523 two test sets (indicated clades of the prokaryotic tree). Areas under each curve: Firmicutes, 0.73;  
524 Alpha/Beta-proteobacteria, 0.68. The diagonal dotted line represents the performance of a purely  
525 random prediction. See also Supplemental Figure S9.

526



527 **FIGURES**

Figure 1

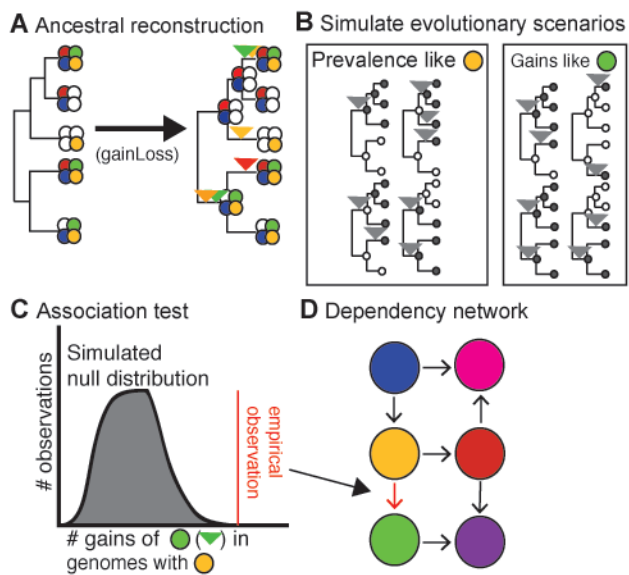

528  
529

Figure 2

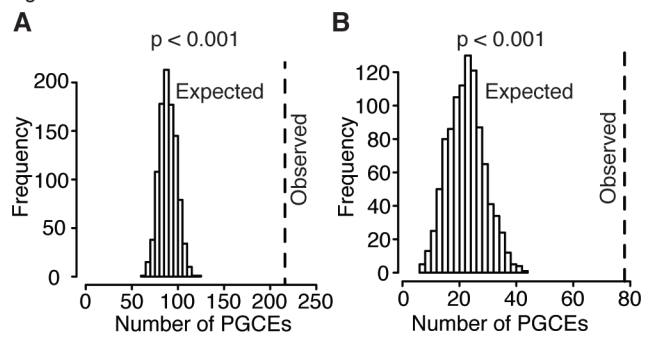

530  
531

Figure 3

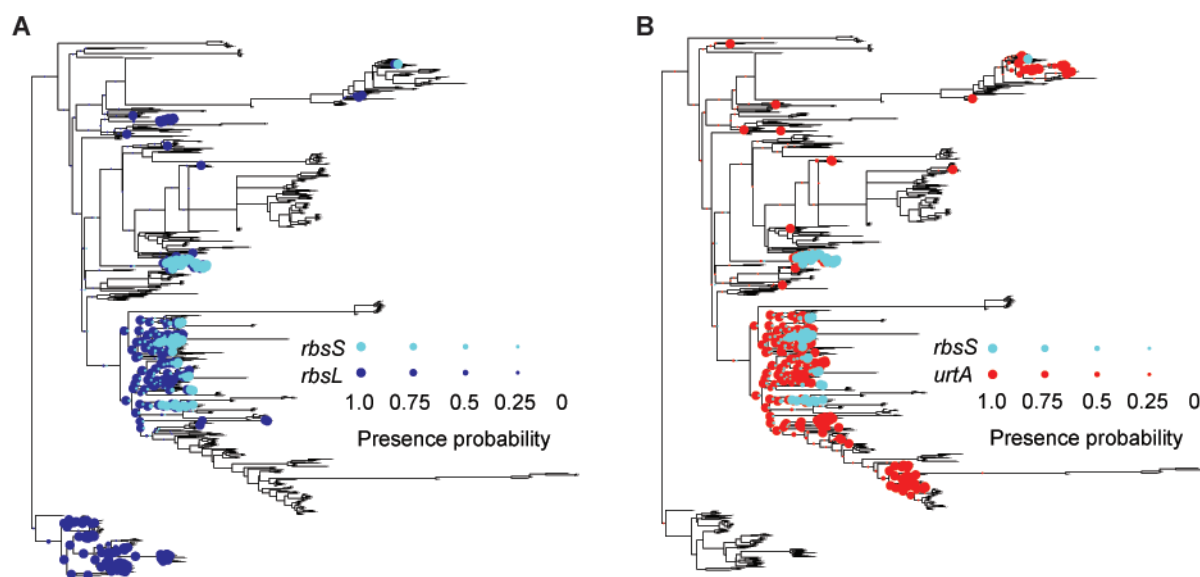

532  
533

Figure 4

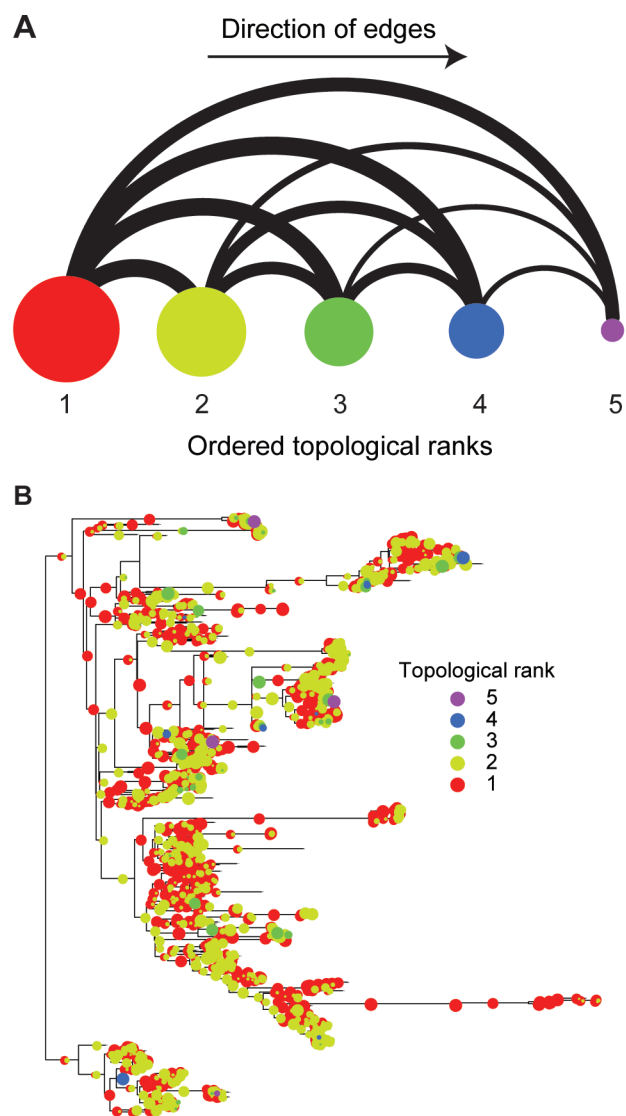

534  
535

Figure 5

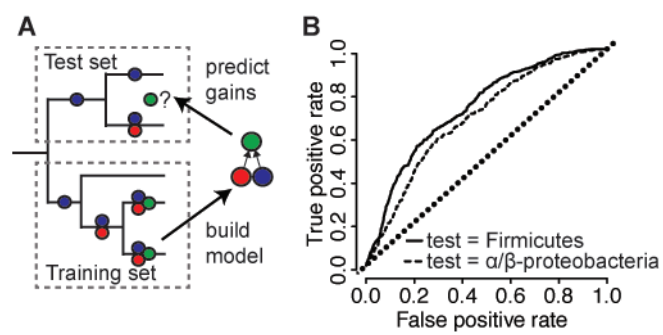

536  
537

538 **TABLES**

539 **Table 1.** Functional groups are enriched in different ranks of the topological sort.

| Annotation label                                       | P-value <sup>1</sup> | Enrichment Ratio <sup>2</sup> |
|--------------------------------------------------------|----------------------|-------------------------------|
| <b>Rank 1 Enrichments</b>                              |                      |                               |
| Cell motility                                          | 1.94E-07             | 1.40                          |
| Bacterial motility proteins                            | 1.85E-11             | 1.41                          |
| Type II secretion system                               | 2.61E-05             | 1.33                          |
| Two-component system                                   | 3.65E-04             | 1.25                          |
| Flagellar system                                       | 1.01E-09             | 1.43                          |
| Pilus system                                           | 2.11E-04             | 1.38                          |
| Metabolism <sup>3</sup>                                | 3.37E-05             | 0.91                          |
| Xenobiotics biodegradation and metabolism <sup>3</sup> | 1.07E-06             | 0.69                          |
| Carbohydrate metabolism <sup>3</sup>                   | 0.00012              | 0.84                          |
| Type IV secretion system <sup>3</sup>                  | 1.26E-09             | 0.20                          |
| <b>Rank 2 Enrichments</b>                              |                      |                               |
| Metabolism                                             | 1.47E-04             | 1.23                          |
| Carbohydrate metabolism                                | 3.08E-06             | 1.58                          |
| <b>Rank 4 Enrichments</b>                              |                      |                               |
| Pathogenicity                                          | 1.88E-06             | 21.6                          |
| Conjugal transfer pilus assembly protein               | 1.08E-04             | 15.0                          |
| Type III protein secretion pathway protein             | 1.88E-06             | 21.6                          |
| ABC-2 type and other transporters                      | 2.31E-04             | 12.5                          |
| Type IV secretion system                               | 1.30E-03             | 8.04                          |

540 1: from a hypergeometric test. All annotations displayed are significant at a 1% false discovery rate.

541 2: The ratio of the observed proportion of genes with this label in the indicated rank to the expected proportion  
542 based on all genes in the network.

543 3: These annotations are depleted (i.e. enrichment ratio significantly less than one) in the first rank.

544

## REFERENCES

- Andam CP, Gogarten JP. 2011. Biased gene transfer in microbial evolution. *Nat Rev Microbiol* **9**: 543–55.
- Andersson I, Backlund A. 2008. Structure and function of Rubisco. *Plant Physiol Biochem* **46**: 275–91.
- Baltrus DA. 2013. Exploring the costs of horizontal gene transfer. *Trends Ecol Evol* **28**: 489–95.
- Benjamini Y, Hochberg Y. 1995. Controlling the false discovery rate: a practical and powerful approach to multiple testing. *J R Stat Soc B* **57**: 289–300.
- Bourgon R, Gentleman R, Huber W. 2010. Independent filtering increases detection power for high-throughput experiments. *Proc Natl Acad Sci U S A* **107**: 9546–51.
- Chen HD, Jewett MW, Groisman E a. 2011. Ancestral genes can control the ability of horizontally acquired loci to confer new traits. *PLoS Genet* **7**: e1002184.
- Christin P-A, Arakaki M, Osborne CP, Edwards EJ. 2015. Genetic enablers underlying the clustered evolutionary origins of C4 photosynthesis in angiosperms. *Mol Biol Evol* **32**: 846–58.
- Cohen O, Ashkenazy H, Burstein D, Pupko T. 2012. Uncovering the co-evolutionary network among prokaryotic genes. *Bioinformatics* **28**: i389–i394.
- Cohen O, Gophna U, Pupko T. 2011. The complexity hypothesis revisited: connectivity rather than function constitutes a barrier to horizontal gene transfer. *Mol Biol Evol* **28**: 1481–9.
- Cohen O, Pupko T. 2010. Inference and characterization of horizontally transferred gene families using stochastic mapping. *Mol Biol Evol* **27**: 703–13.
- Conte GL, Arnegard ME, Peichel CL, Schluter D. 2012. The probability of genetic parallelism and convergence in natural populations. *Proc R Soc B Biol Sci* **279**: 5039–47.
- Csardi G, Nepusz T. 2006. The igraph Software Package for Complex Network Research. *InterJournal Complex Sy.*
- Dehal PS, Joachimiak MP, Price MN, Bates JT, Baumohl JK, Chivian D, Friedland GD, Huang KH, Keller K, Novichkov PS, et al. 2010. MicrobesOnline: an integrated portal for comparative and functional genomics. *Nucleic Acids Res* **38**: D396–400.
- Delwiche CF, Palmer JD. 1996. Rampant horizontal transfer and duplication of rubisco genes in eubacteria and plastids. *Mol Biol Evol* **13**: 873–882.

- Eppley RW, Peterson BJ. 1979. Particulate organic matter flux and planktonic new production in the deep ocean. *Nature* **282**: 677–680.
- Gogarten JP, Doolittle WF, Lawrence JG. 2002. Prokaryotic evolution in light of gene transfer. *Mol Biol Evol* **19**: 2226–38.
- Gong LI, Suchard MA, Bloom JD. 2013. Stability-mediated epistasis constrains the evolution of an influenza protein. *Elife* **2**: e00631.
- Gophna U, Ofran Y. 2011. Lateral acquisition of genes is affected by the friendliness of their products. *Proc Natl Acad Sci U S A* **108**: 343–8.
- Gould SJ, Lewontin RC. 1979. The Spandrels of San Marco and the Panglossian Paradigm: A Critique of the Adaptationist Programme. *Proc R Soc B Biol Sci* **205**: 581–598.
- Hagberg A, Schult D, Swart P. 2013. NetworkX. High productivity software for complex networks. <https://networkx.lanl.gov/>.
- Harms MJ, Thornton JW. 2014. Historical contingency and its biophysical basis in glucocorticoid receptor evolution. *Nature* **512**: 203–7.
- Hsu HT. 1975. An Algorithm for Finding a Minimal Equivalent Graph of a Digraph. *J ACM* **22**: 11–16.
- Huelsenbeck JP, Nielsen R, Bollback JP. 2003. Stochastic Mapping of Morphological Characters. *Syst Biol* **52**: 131–158.
- Iwasaki W, Takagi T. 2009. Rapid pathway evolution facilitated by horizontal gene transfers across prokaryotic lineages. ed. I. Matic. *PLoS Genet* **5**: e1000402.
- Jain R, Rivera MC, Lake J a. 1999. Horizontal gene transfer among genomes: the complexity hypothesis. *Proc Natl Acad Sci U S A* **96**: 3801–6.
- Jain R, Rivera MC, Moore JE, Lake JA. 2003. Horizontal gene transfer accelerates genome innovation and evolution. *Mol Biol Evol* **20**: 1598–602.
- Jeong H, Sung S, Kwon T, Seo M, Caetano-Anollés K, Choi SH, Cho S, Nasir A, Kim H. 2015. HGTtree: database of horizontally transferred genes determined by tree reconciliation. *Nucleic Acids Res* gkv1245–.
- Johnson CM, Grossman AD. 2014. Identification of host genes that affect acquisition of an integrative and conjugative element in *Bacillus subtilis*. *Mol Microbiol*.
- Kahn AB. 1962. Topological Sorting of Large Networks. *Commun ACM* **5**: 558–562.



- Kanehisa M, Goto S, Sato Y, Furumichi M, Tanabe M. 2012. KEGG for integration and interpretation of large-scale molecular data sets. *Nucleic Acids Res* **40**: D109–14.
- Lerat E, Daubin V, Ochman H, Moran NA. 2005. Evolutionary origins of genomic repertoires in bacteria. ed. D. Hillis. *PLoS Biol* **3**: e130.
- Letunic I, Bork P. 2011. Interactive Tree Of Life v2: online annotation and display of phylogenetic trees made easy. *Nucleic Acids Res* **39**: W475–8.
- Levy R, Borenstein E. 2013. Metabolic modeling of species interaction in the human microbiome elucidates community-level assembly rules. *Proc Natl Acad Sci U S A* **110**: 12804–9.
- Maddison WP. 1990. A Method for Testing the Correlated Evolution of Two Binary Characters: Are Gains or Losses Concentrated on Certain Branches of a Phylogenetic Tree? *Evolution (N Y)* **44**: 539–557.
- Mira A, Ochman H, Moran NA. 2001. Deletional bias and the evolution of bacterial genomes. *Trends Genet* **17**: 589–596.
- Nowell RW, Green S, Laue BE, Sharp PM. 2014. The extent of genome flux and its role in the differentiation of bacterial lineages. *Genome Biol Evol* **6**: 1514–29.
- Ord TJ, Summers TC. 2015. Repeated evolution and the impact of evolutionary history on adaptation. *BMC Evol Biol* **15**: 137.
- Orr HA. 2005. The Probability of Parallel Evolution. *Evolution (N Y)* **59**: 216–220.
- Pal C, Papp B, Lercher MJ. 2005. Horizontal gene transfer depends on gene content of the host. *Bioinformatics* **21**: ii222–ii223.
- Paradis E, Claude J, Strimmer K. 2004. APE: Analyses of Phylogenetics and Evolution in R language. *Bioinformatics* **20**: 289–290.
- Van Passel MWJ, Marri PR, Ochman H. 2008. The emergence and fate of horizontally acquired genes in *Escherichia coli*. *PLoS Comput Biol* **4**: e1000059.
- Popa O, Dagan T. 2011. Trends and barriers to lateral gene transfer in prokaryotes. *Curr Opin Microbiol* **14**: 615–23.
- Popa O, Hazkani-Covo E, Landan G, Martin W, Dagan T. 2011. Directed networks reveal genomic barriers and DNA repair bypasses to lateral gene transfer among prokaryotes. *Genome Res* **21**: 599–609.

- Press MO, Li H, Creanza N, Kramer G, Queitsch C, Sourjik V, Borenstein E. 2013. Genome-scale co-evolutionary inference identifies functions and clients of bacterial Hsp90. *PLoS Genet* **9**: e1003631.
- Puigbò P, Lobkovsky AE, Kristensen DM, Wolf YI, Koonin E V. 2014. Genomes in turmoil: Quantification of genome dynamics in prokaryote supergenomes. *BMC Biol* **12**: 66.
- R Core Team. 2016. R: A Language and Environment for Statistical Computing. R Foundation for Statistical Computing, Vienna, Austria. <http://www.R-project.org/>.
- Shannon P, Markiel A, Ozier O, Baliga NS, Wang JT, Ramage D, Amin N, Schwikowski B, Ideker T. 2003. Cytoscape: a software environment for integrated models of biomolecular interaction networks. *Genome Res* **13**: 2498–504.
- Smillie CS, Smith MB, Friedman J, Cordero OX, David L a, Alm EJ. 2011. Ecology drives a global network of gene exchange connecting the human microbiome. *Nature* **480**: 241–4.
- Sohm JA, Webb EA, Capone DG. 2011. Emerging patterns of marine nitrogen fixation. *Nat Rev Microbiol* **9**: 499–508.
- Sorek R, Zhu Y, Creevey CJ, Francino MP, Bork P, Rubin EM. 2007. Genome-wide experimental determination of barriers to horizontal gene transfer. *Science* **318**: 1449–52.
- Soucy SM, Huang J, Gogarten JP. 2015. Horizontal gene transfer: building the web of life. *Nat Rev Genet* **16**: 472–482.
- Venables WN, Ripley BD. 2002. *Modern Applied Statistics with S*. Fourth Edi. Springer, Springer.
- De Visser JAGM, Krug J. 2014. Empirical fitness landscapes and the predictability of evolution. *Nat Rev Genet* **15**: 480–490.
- Weinreich DM, Delaney NF, Depristo MA, Hartl DL. 2006. Darwinian evolution can follow only very few mutational paths to fitter proteins. *Science* **312**: 111–4.
